# Supplementary material for: Benefits, harms and cost-effectiveness of cervical screening, triage and treatment strategies for women in the general population
Source: PubMed Central journal article supplement (PMC10719104; doi:10.1038/s41591-023-02600-4), 2023-12-12
Supplement: 41591_2023_2600_MOESM1_ESM.pdf [file 41591_2023_2600_MOESM1_ESM.pdf]

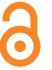

---

# **Benefits, harms and cost-effectiveness of cervical screening, triage and treatment strategies for women in the general population**

---

In the format provided by the authors and unedited

Supplementary Figure 1: Schematic showing how the systematic review data, cost data and screening algorithms interact with the Policy1-Cervix platform (a). Three stage process for the modelled evaluation to inform the updated WHO cervical screening guidelines (b)

(a)

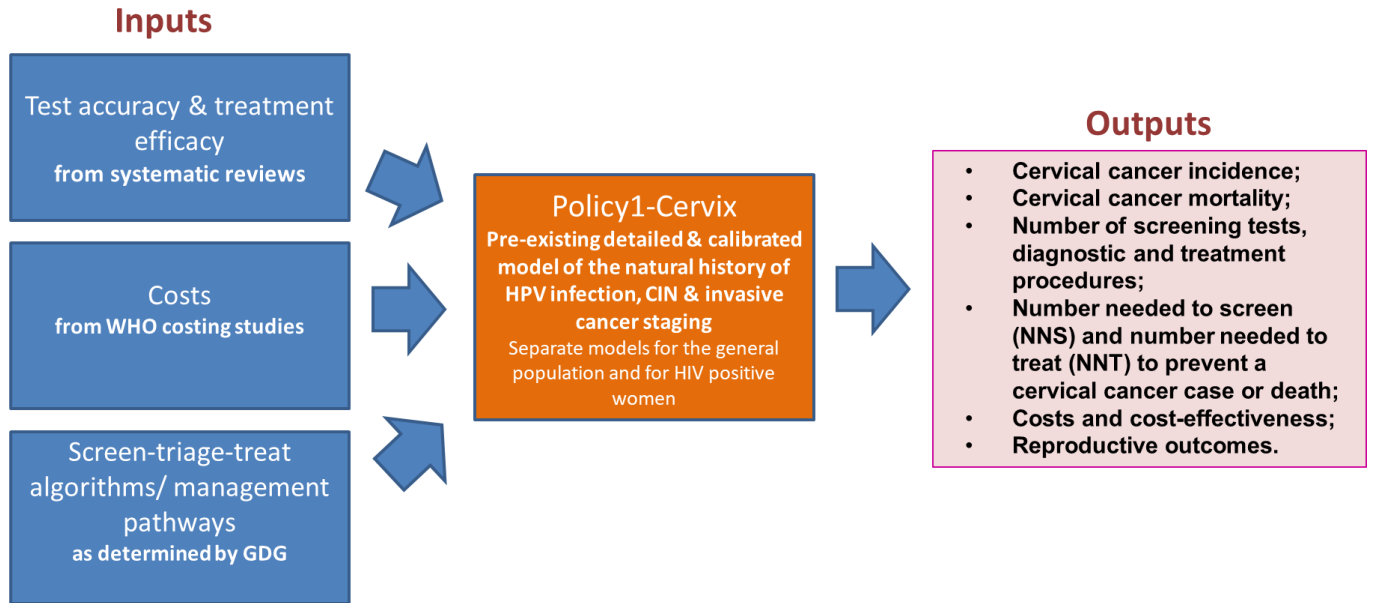

(b)

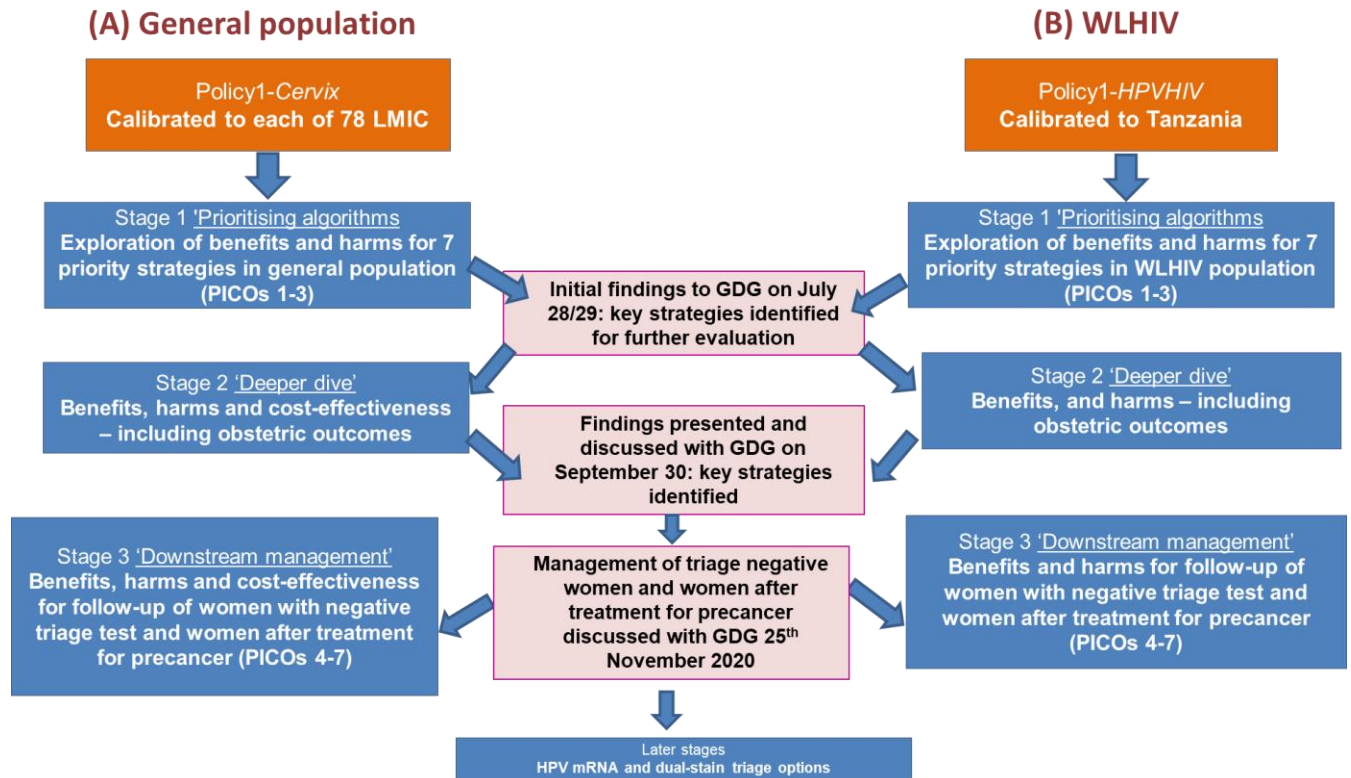

Supplementary Figure 2: Policy1-Cervix model platform

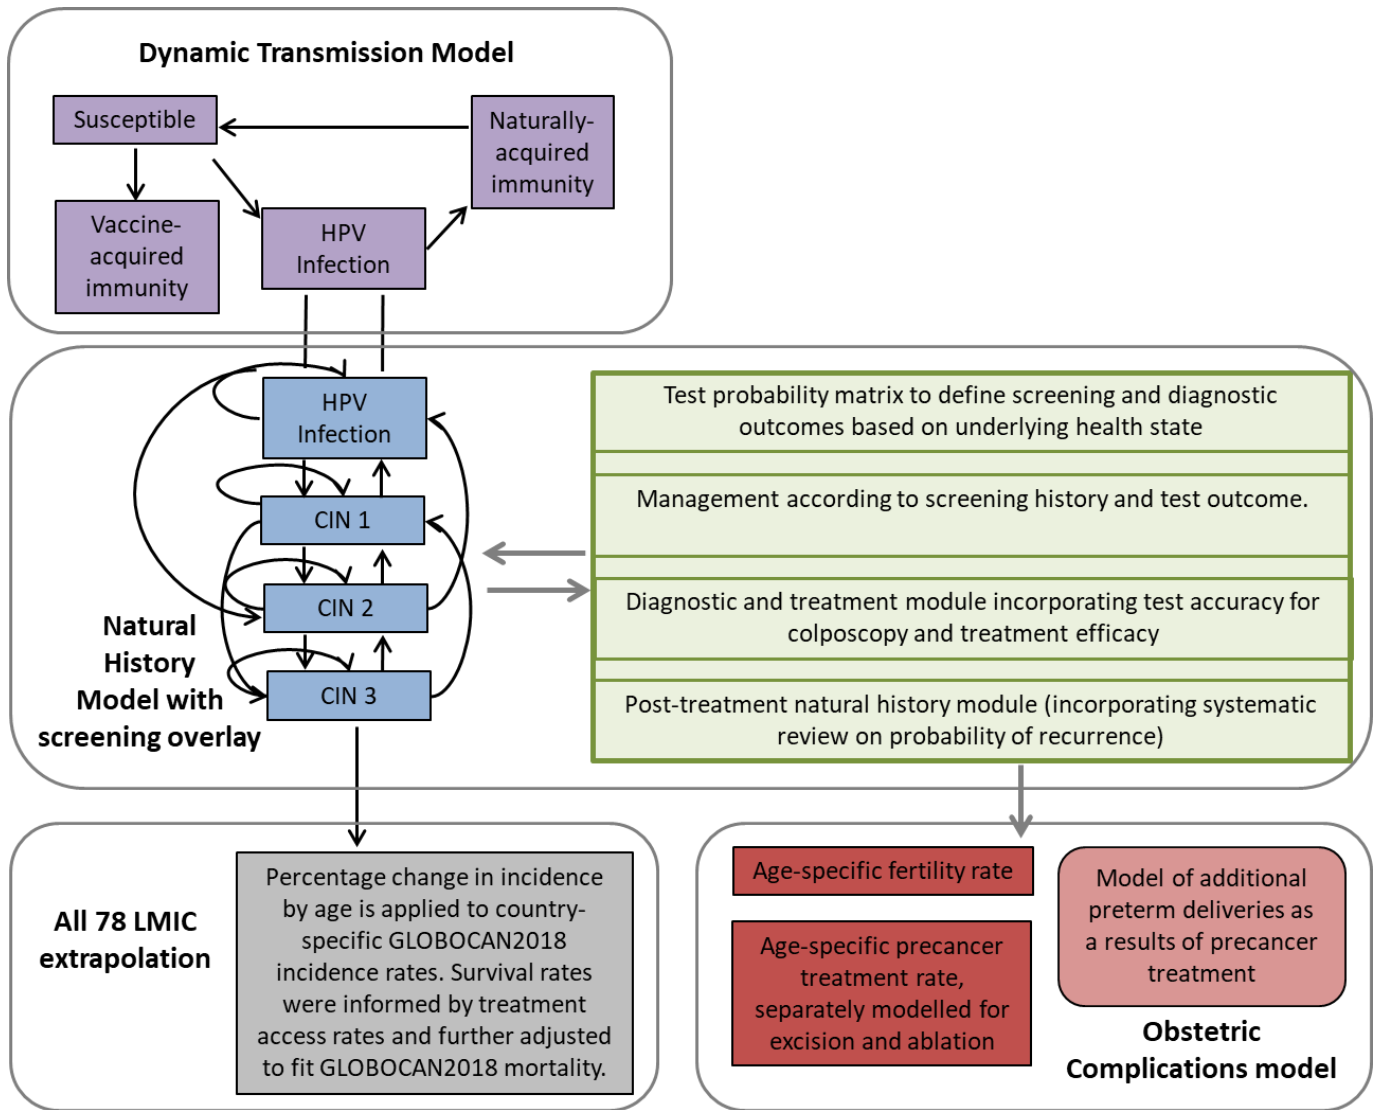

Supplementary Figure 3: calibration curves across All 78 LMICs and across the regions

(a) All-78 LMICs

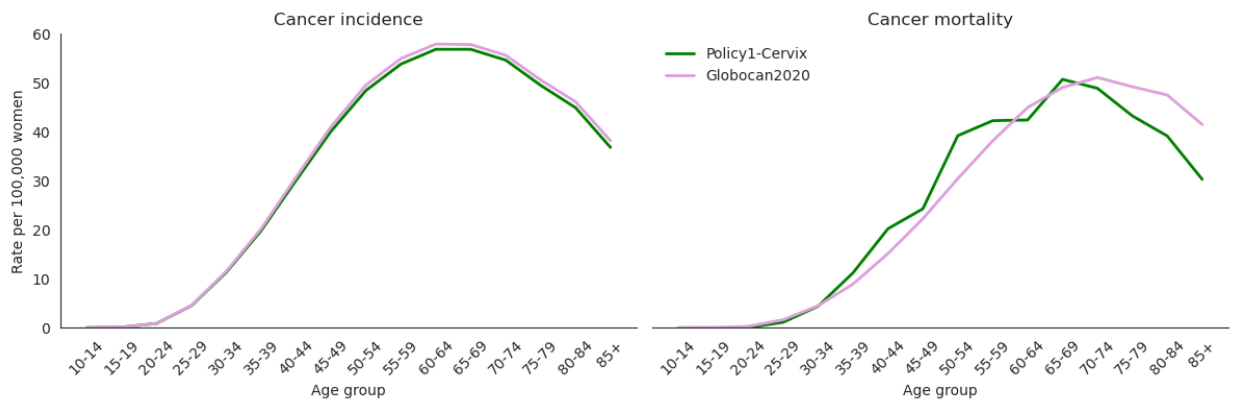

(b) East Asia & Pacific

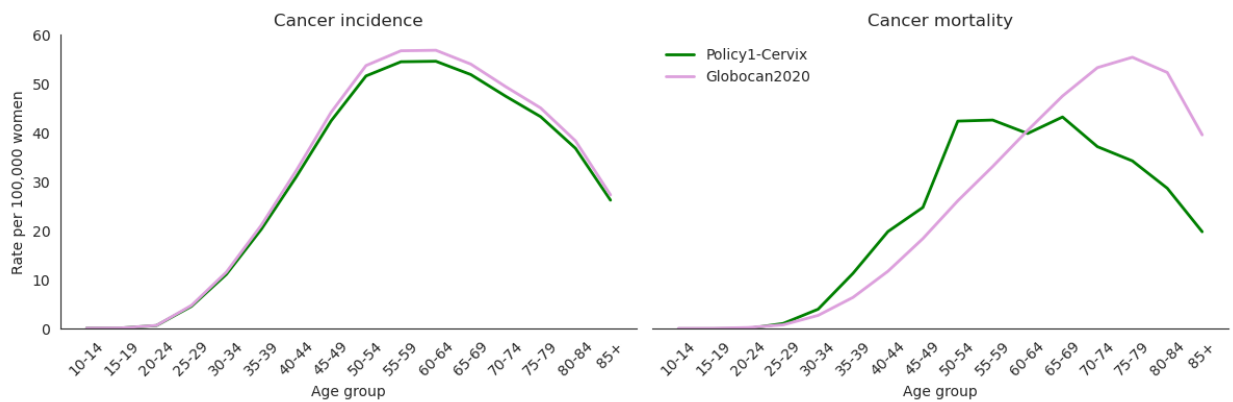

(c) Europe & Central Asia

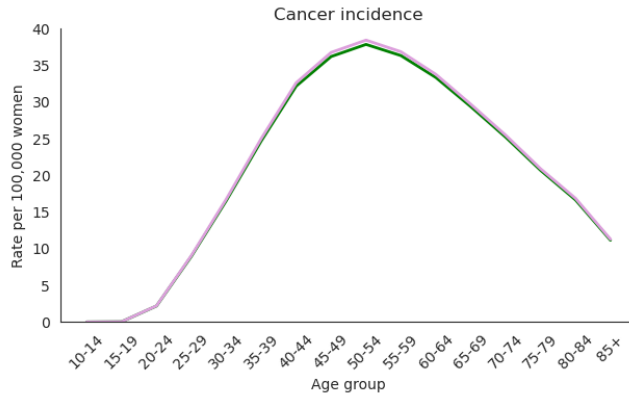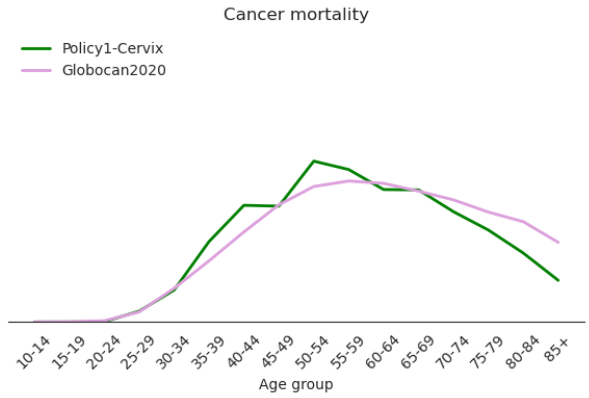

*(d) Latin America & Caribbean*

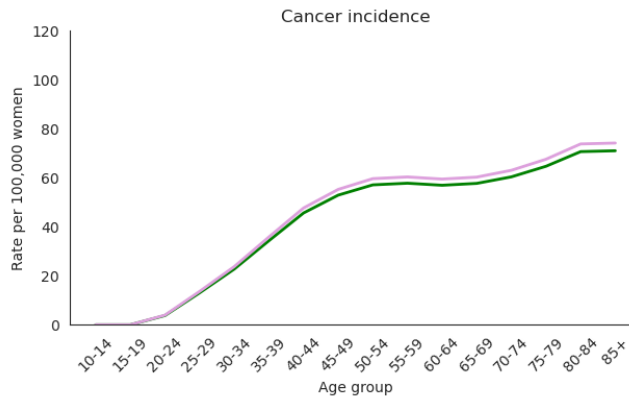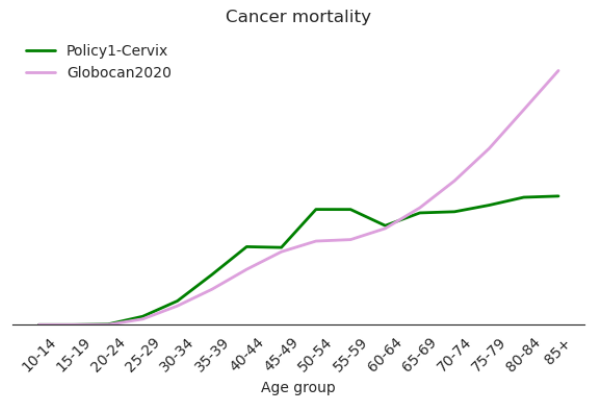

*(e) Middle East & North Africa*

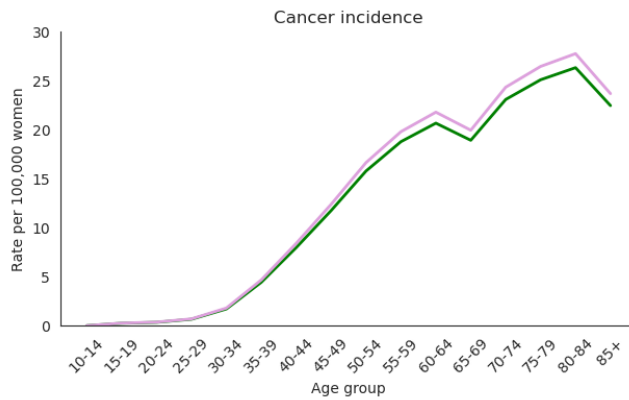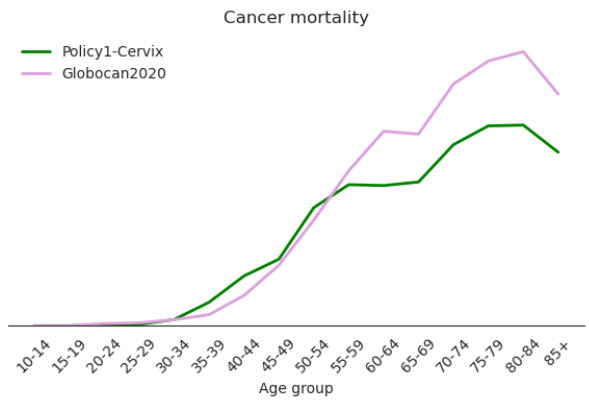

*(f) South Asia*

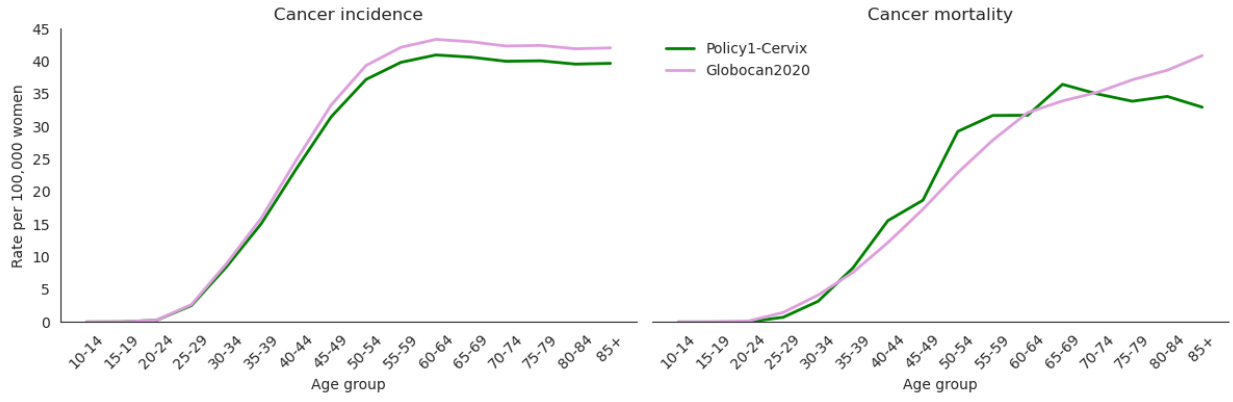

*(g) Sub-Saharan Africa*

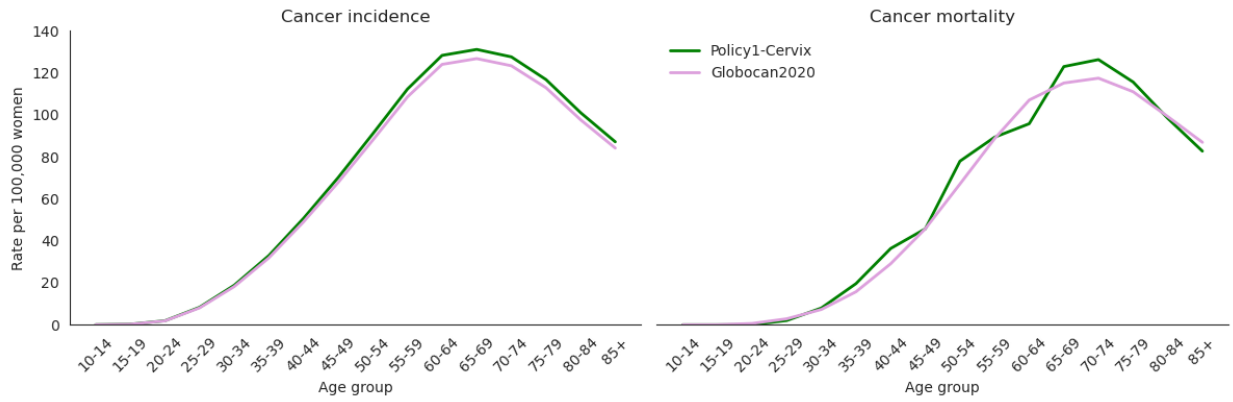

Supplementary Figure 4: Priority screening algorithms

**(a) Primary VIA**

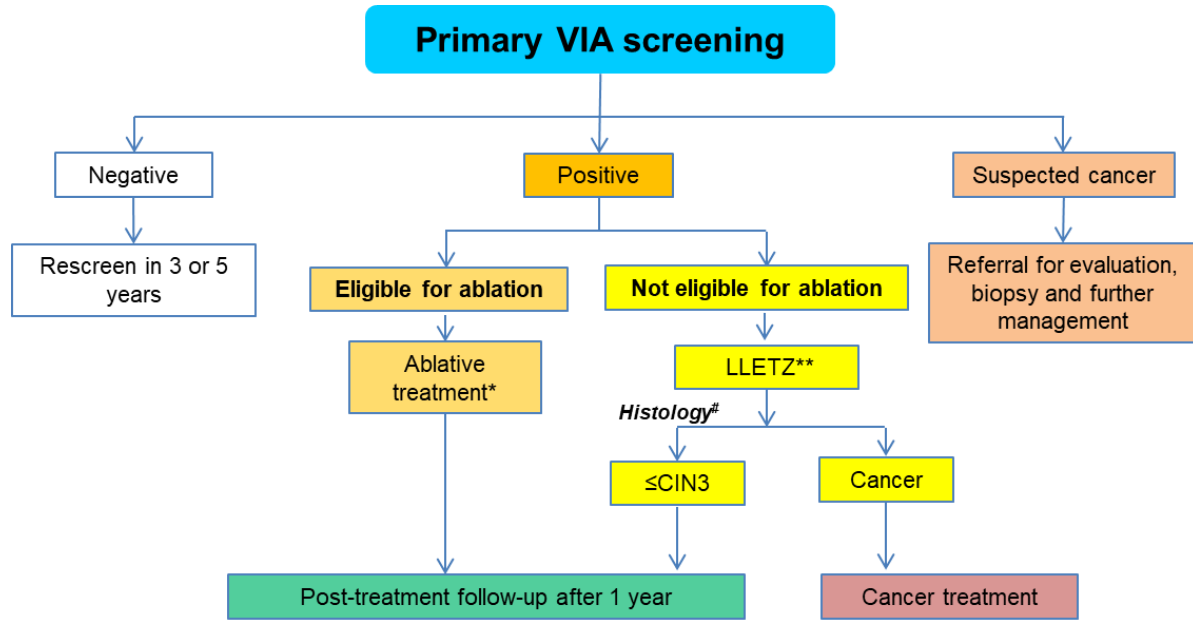

**(b) Primary cytology, HPV triage for ASCUS**

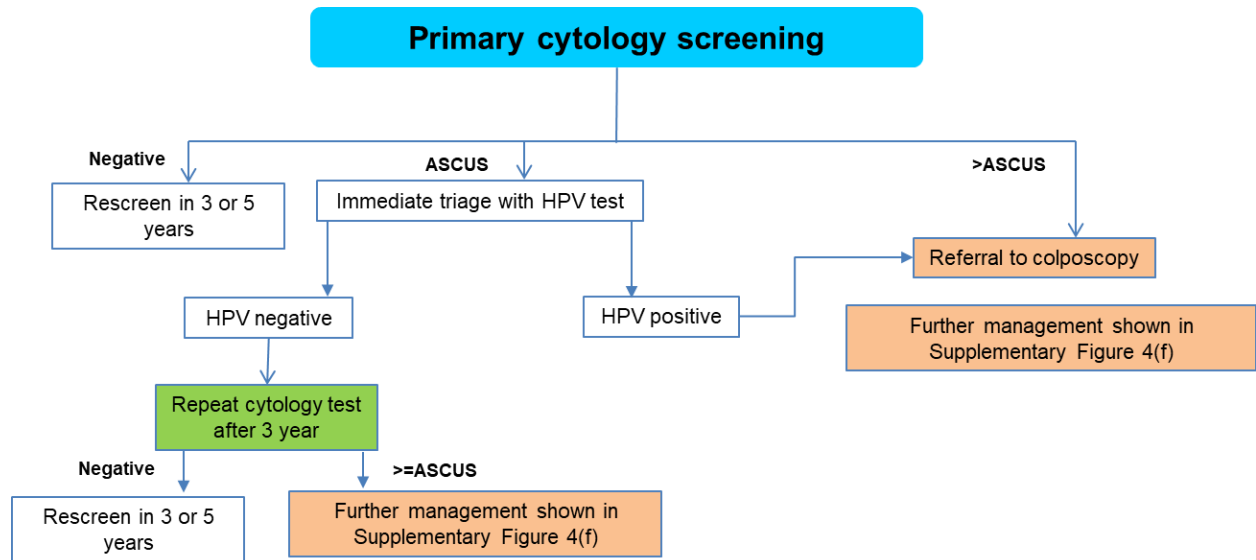

**(c) Primary HPV without triage**



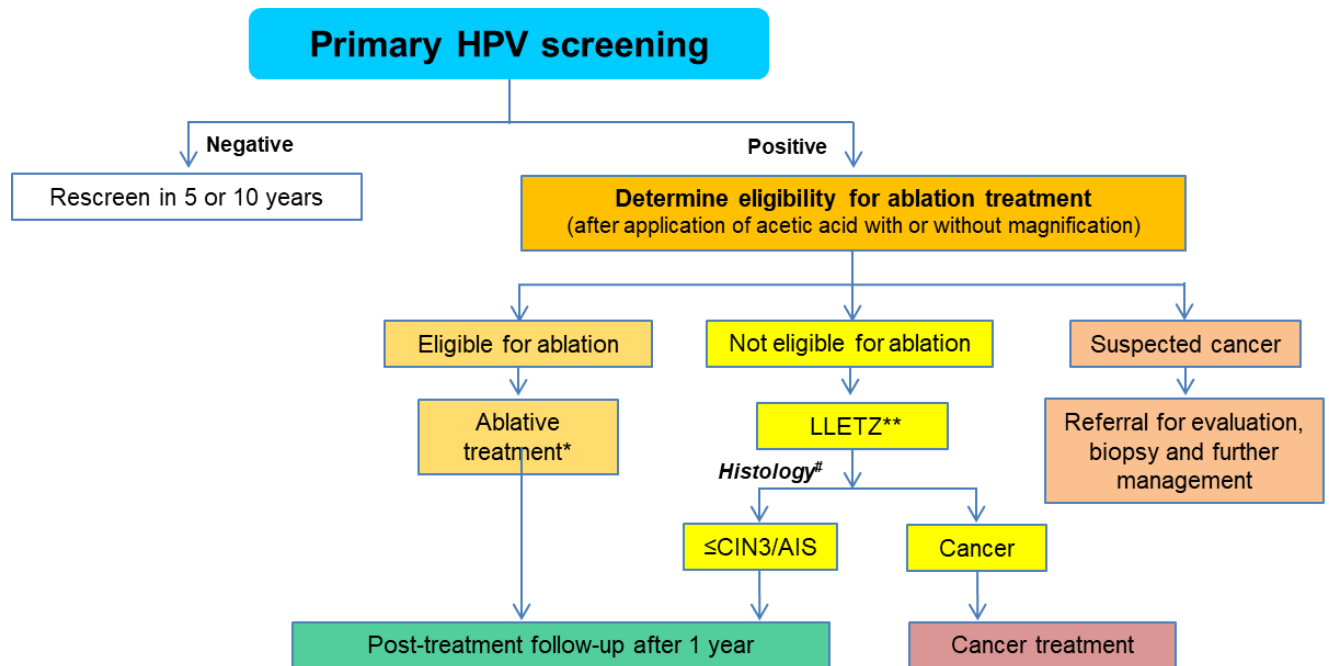

**(d) Primary HPV, 16/18 triage**

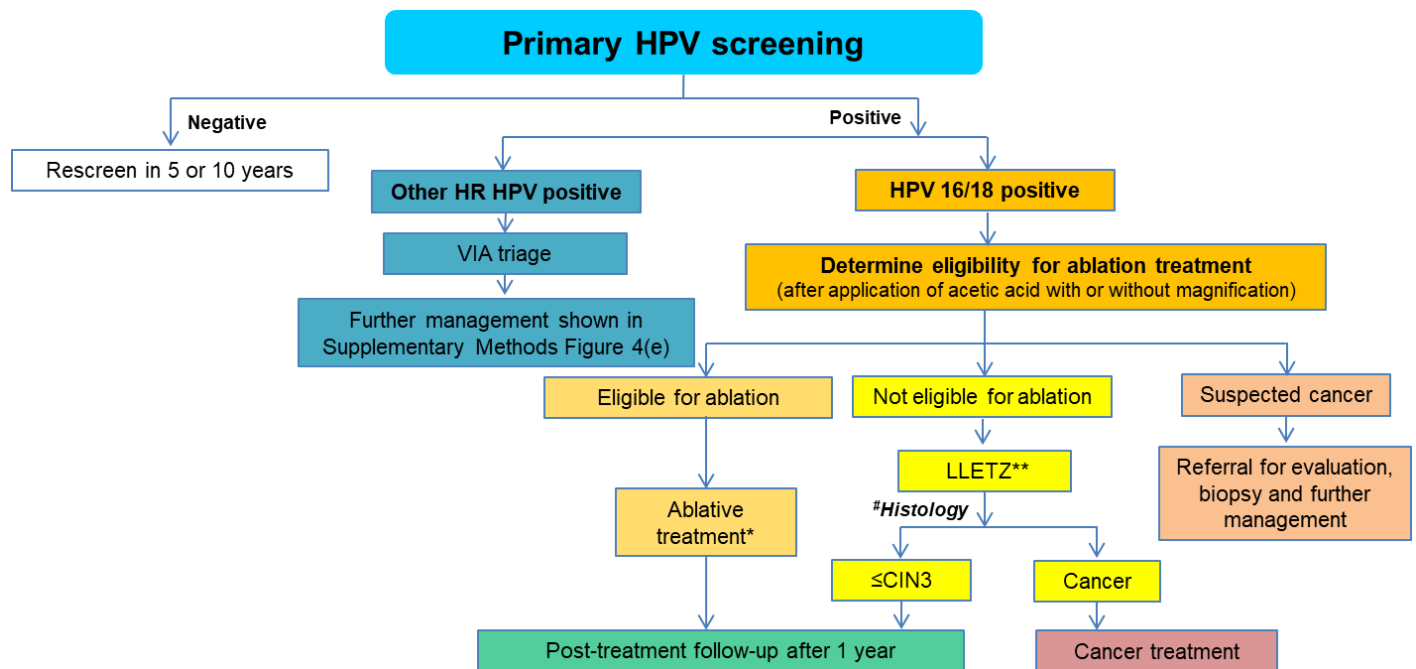

**(e) Primary HPV, VIA triage**

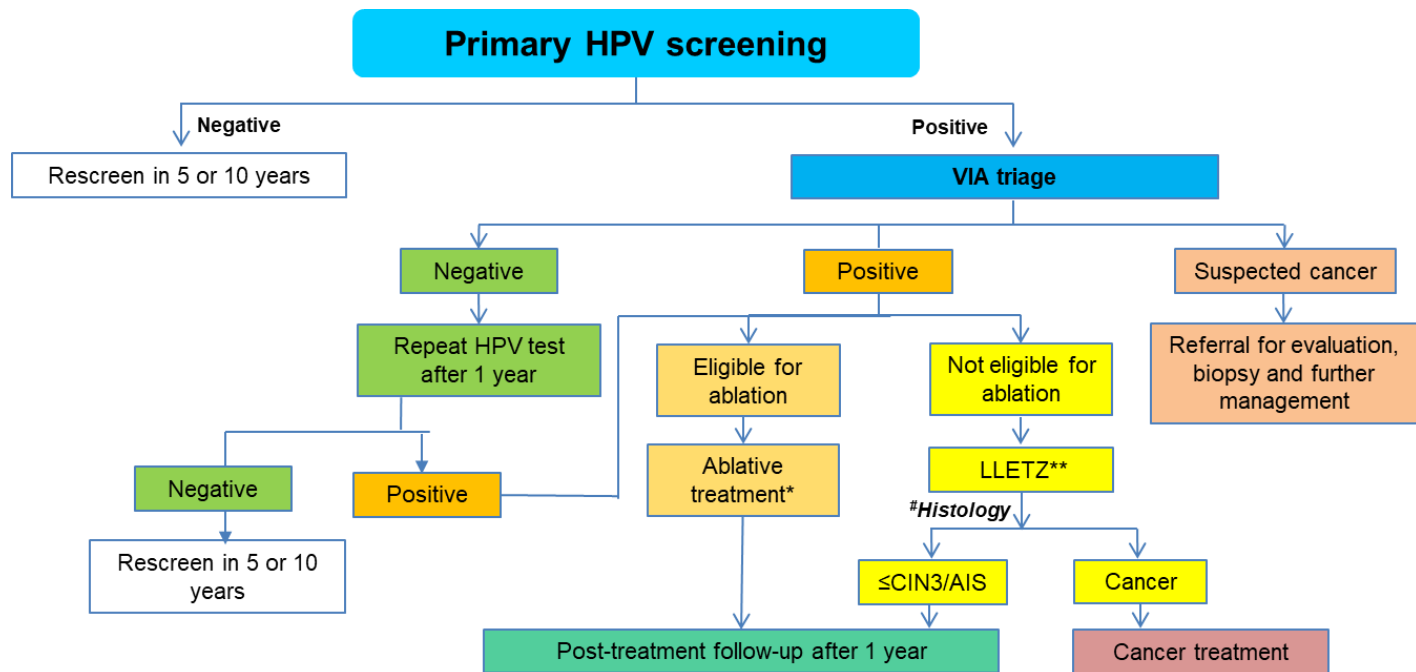

(f) Primary HPV, colposcopy triage<sup>^</sup>

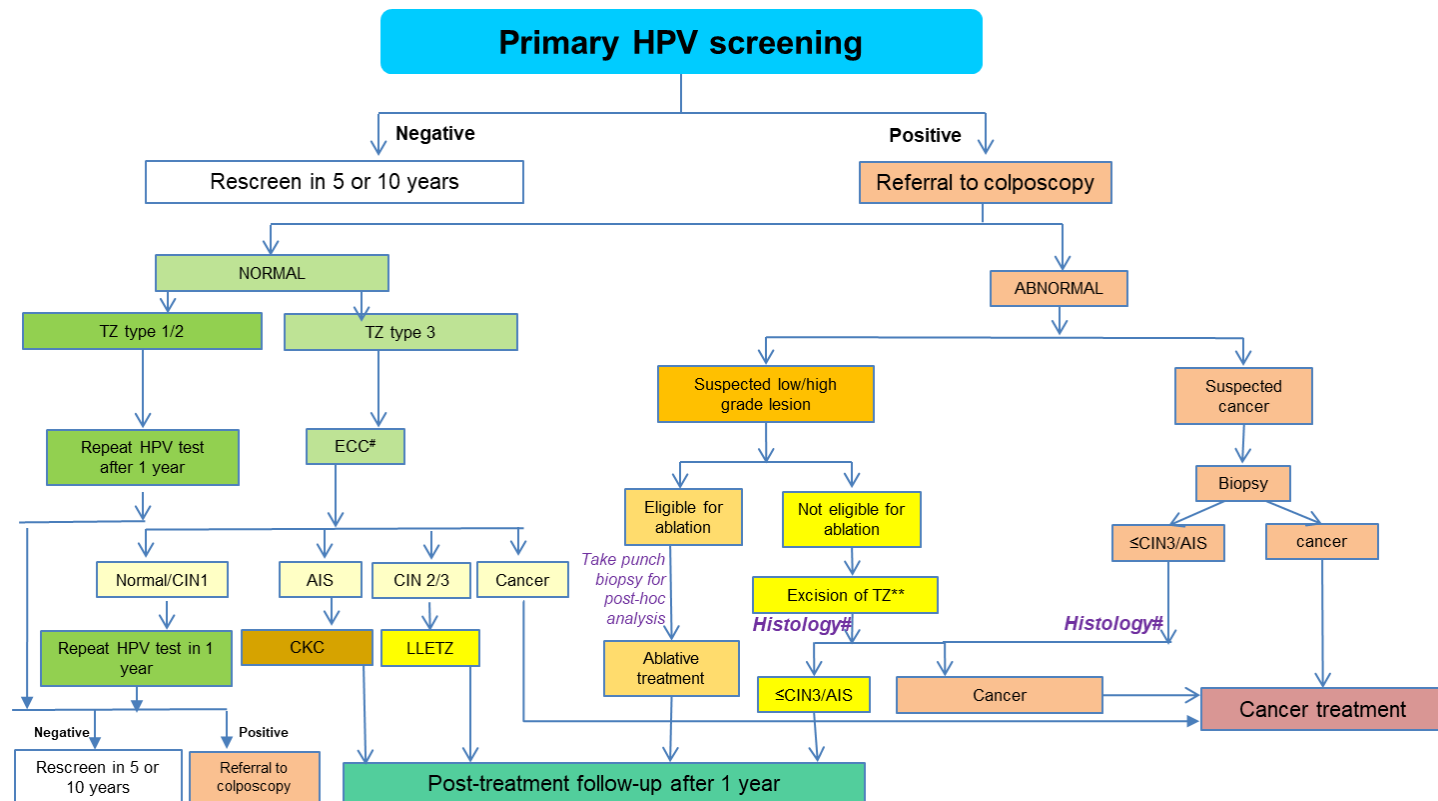

(g) Primary HPV (cytology triage)<sup>^</sup>

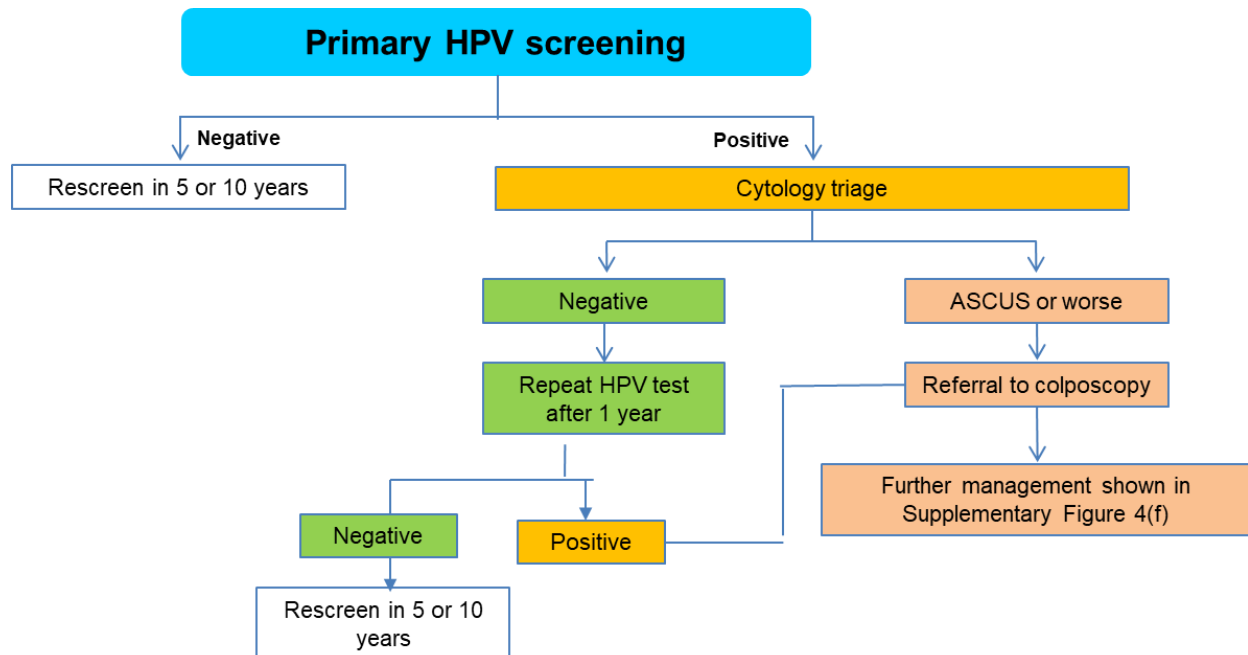

\*Ablative treatment includes cryotherapy and thermal ablation. \*\*CKC if LLETZ not available. # Histology may not be available in certain settings. Women should be followed-up after 1 year or to report earlier, if they have any of the symptoms of cervical cancer. ^ Women referred with cytology LSIL or worse at colposcopy will receive biopsy even if they have a type 1 or type 2 transformation zone at colposcopy.

*Supplementary Table 1: Screening ages and frequencies considered for each screening algorithm*

| <b>Screening algorithms</b>                     | <b>Screening frequency and age-range (number of lifetime routine screening tests)</b>                                                                                                           |
|-------------------------------------------------|-------------------------------------------------------------------------------------------------------------------------------------------------------------------------------------------------|
| <b>Primary VIA*</b>                             | <ul style="list-style-type: none"> <li>• 3 yearly, 30-50 years (7X)</li> <li>• 5 yearly, 30-50 years (5X)</li> </ul>                                                                            |
| <b>Cytology, HPV triage**</b>                   |                                                                                                                                                                                                 |
| <b>Primary HPV*</b>                             | <ul style="list-style-type: none"> <li>• 5 yearly, 30-50 years (5X)</li> <li>• 10 yearly, 30-50 years (3X)</li> <li>• 10 yearly, 35-45 years (2X) ‘Elimination strategy<sup>§</sup>’</li> </ul> |
| <b>Primary HPV, HPV16/18 triage<sup>^</sup></b> |                                                                                                                                                                                                 |
| <b>Primary HPV, VIA triage<sup>^^</sup></b>     |                                                                                                                                                                                                 |
| <b>Primary HPV, colposcopy triage</b>           |                                                                                                                                                                                                 |
| <b>Primary HPV, cytology triage**</b>           |                                                                                                                                                                                                 |

\*All positive women treated after assessment of eligibility for ablative treatment. \*\*Triage positive referred to colposcopy.

<sup>^</sup>VIA triage positive women treated after assessment of eligibility for ablative treatment. <sup>^</sup>HPV 16/18 positive women treated after assessment of eligibility for ablative treatment. Women positive for HPV types other than HPV 16/18 (‘OHR’) are triaged with VIA.

<sup>§</sup>The ‘Elimination strategy’ refers to the screening test, ages and frequencies assumed in the earlier analysis of cervical cancer elimination timeline.<sup>9,15</sup>

Supplementary Table 2: HPV-FRAME reporting standard checklist for the modelling in the general population of women

| a) Inputs                                    | Reported? (Y/N) | Reported by age? (Y/N) | Report by sex (F-only, M-only or both)? | Comments                                                                                                                                                                                                                                                                                                                                                   |
|----------------------------------------------|-----------------|------------------------|-----------------------------------------|------------------------------------------------------------------------------------------------------------------------------------------------------------------------------------------------------------------------------------------------------------------------------------------------------------------------------------------------------------|
| <b>Core reporting standard</b>               |                 |                        |                                         |                                                                                                                                                                                                                                                                                                                                                            |
| Target population for intervention           | Y               | Y                      | F                                       | Cohort of women who would turn 30 in 2030 for the general population.<br>Screening algorithms target between ages 30-50.                                                                                                                                                                                                                                   |
| Sexual behaviour                             | N               | N                      | N                                       | Implicitly accounted for in calibration. Data not directly used since vaccination is not modelled here and therefore a dynamic transmission model is not required.                                                                                                                                                                                         |
| Cohort examined for evaluation/ time horizon | Y               | Y                      | F-only                                  | The lifetime of a single cohort of women turning 30 in 2030. For CEA, discounting is applied from age 30 onwards.                                                                                                                                                                                                                                          |
| Quality of life assumptions                  | Y               | Y                      | F-only                                  | Listed in Supplementary Table 8 (based on Global Burden of Disease study 2010 <sup>67</sup> ).                                                                                                                                                                                                                                                             |
| Calibration                                  | Y               | Y                      | F-only                                  | Reproduces GLOBOCAN 2018 incidence at a country level. The models were then calibrated to final mortality outcomes to country- and age-specific rates from GLOBOCAN 2018 by incorporating a ‘quality factor’ into the final estimated country- and stage-specific survival assumptions. Details on this calibration in previous CCEMC work. <sup>2,3</sup> |
| Validation (where possible)                  | Y               | Y (implicitly)         | F-only                                  | The models has previously been used to evaluate various HPV vaccination and cervical screening strategies for many countries, including high- resource countries, low-resource settings and globally (see Online Methods).                                                                                                                                 |

| <b>a) Inputs</b>                                                     | <b>Reported? (Y/N)</b> | <b>Reported by age? (Y/N)</b> | <b>Report by sex (F-only, M-only or both)?</b> | <b>Comments</b>                                                                                                                                                                              |
|----------------------------------------------------------------------|------------------------|-------------------------------|------------------------------------------------|----------------------------------------------------------------------------------------------------------------------------------------------------------------------------------------------|
| Costs                                                                | Y                      | Y (implicitly)                | F-only                                         | Same unit costs are assumed regardless of age and are listed in Supplementary Table 2.                                                                                                       |
| <b>Reporting standard for model of cervical screening</b>            |                        |                               |                                                |                                                                                                                                                                                              |
| Routine screening behaviour (routine and follow-up and test of cure) | Y                      | Y                             | F-only                                         | We assumed 70% of women attend a given routine screen with 90% adherence except for some circumstances such as where HPV point-of-care is possible. This is listed in the main text methods. |
| Screening test (s) and colposcopy accuracies                         | Y                      | Y (implicitly)                | F-only                                         | Sensitivity and specificity of tests for CIN2+ are listed in Supplementary Tables 3-4.                                                                                                       |
| Abnormal test management (primary and triage)                        | Y                      | Y                             | F-only                                         | Flowcharts are detailed in Supplementary Figure 4 and the algorithms (age eligibility, routine screening frequency) are detailed in Supplementary Table 1.                                   |
| Diagnostic follow-up of abnormal tests                               | Y                      | Y                             | F-only                                         | Flowcharts are detailed in Supplementary Figure 4                                                                                                                                            |
| Management by disease grade (confirmed disease)                      | Y                      | Y                             | F-only                                         | Flowcharts are detailed in Supplementary Figure 4                                                                                                                                            |
| Sources of information for screening structure and parameterization  | Y                      | Y                             | F-only                                         | Specified in main text and Online Methods as being informed by the Guidelines Development Group.                                                                                             |
| <b>Reporting standard for models of HPV prevention in LMIC</b>       |                        |                               |                                                |                                                                                                                                                                                              |
| HIV prevalence rates, if endemic in country                          | N                      | N                             | N                                              | We did not explicitly take into account HIV prevalence in this study. This is addressed in a companion study.                                                                                |
| Description of any opportunistic or pilot/demonstration              | N                      | N                             | N                                              | As this study models the impact of HPV vaccination and cervical screening strategies in 78 LMICs, this is not relevant.                                                                      |

| <b>a) Inputs</b>          | <b>Reported? (Y/N)</b> | <b>Reported by age? (Y/N)</b> | <b>Report by sex (F-only, M-only or both)?</b> | <b>Comments</b> |
|---------------------------|------------------------|-------------------------------|------------------------------------------------|-----------------|
| screening project ongoing |                        |                               |                                                |                 |

| <b>b) Outputs</b>                                                     | <b>Reported? (Y/N)</b> | <b>Reported by age? (Y/N)</b> | <b>Report by sex (F-only, M-only or both)?</b> | <b>Report as calibration or validation target? (Y/N)</b>                                                                                                                                                                                                                                                                                                                 |
|-----------------------------------------------------------------------|------------------------|-------------------------------|------------------------------------------------|--------------------------------------------------------------------------------------------------------------------------------------------------------------------------------------------------------------------------------------------------------------------------------------------------------------------------------------------------------------------------|
| <b>Core reporting standard</b>                                        |                        |                               |                                                |                                                                                                                                                                                                                                                                                                                                                                          |
| Cancer incidence, mortality, life years, QALYs/DALYs (as appropriate) | Y                      | Y (implicitly)                | F-only                                         | Age-standardized and age-specific incidence and mortality rates were reported along with cases and deaths per 100,000 women. HALYS (Health-adjusted life years saved) were reported for the main results and life years were reported as part of the sensitivity analysis. Age-specific results not directly reported but are critical to calculation of HALYS and ASRs. |
| HPV prevalence, pre-intervention                                      | N                      | N                             | N                                              | This level of detail is not reported. Herd immunity effects could be a factor for vaccination but vaccination is not modelled in this paper.                                                                                                                                                                                                                             |
| CIN2 detected                                                         | N                      | N                             | N                                              | This level of detail is not reported.                                                                                                                                                                                                                                                                                                                                    |
| Sensitivity analysis on key inputs                                    | Y                      | Y (implicitly)                | F-only                                         | One-way sensitivity analysis were performed for adherence rates and primary test performance. Life years were assessed along with equal discounting for both HALYs and costs. Probabilistic sensitivity analysis was performed for costs.                                                                                                                                |
| Incremental cost-effectiveness ratios and costs saved                 | Y                      | N                             | F-only                                         | ICERs along the cost-effectiveness frontiers are displayed in the main text and Extended Display Items (for sensitivity analysis)                                                                                                                                                                                                                                        |

QALYs: quality-adjusted life-years

*Supplementary Table 3: Cross-sectional sensitivity and specificity inputs used for (a) primary test technologies and (b) combined primary and triage test outputs. We also present assumptions for test performance considered in sensitivity analysis for primary test technologies in (c)*

(a)

| <b>Primary test</b>                    | <b>Sensitivity CIN2+ targets</b>                                                                                       | <b>Specificity CIN2+ targets</b>                    | <b>Model calculated sensitivity to CIN2+<sup>@</sup></b> | <b>Model calculated specificity to CIN2+<sup>@</sup></b> |
|----------------------------------------|------------------------------------------------------------------------------------------------------------------------|-----------------------------------------------------|----------------------------------------------------------|----------------------------------------------------------|
| <b>Primary VIA</b>                     | 41% CIN2+ as a realistic sensitivity.<br>Additionally present a high sensitivity scenario (60% CIN2+) for all outputs. | 78%                                                 | 39.1-42.8%                                               | 78.0-80.8%                                               |
| <b>Primary cytology (LSIL cut-off)</b> | LBC: 70.3% (59.7-79.1%)<br>Conv: 62.8% (46.8-76.5%)                                                                    | LBC: 96.2% (94.6-97.4%)<br>Conv: 97.7% (96.1-98.7%) | 67-71.3%                                                 | 94.1-97.8%                                               |
| <b>Primary HPV</b>                     | 92.60% (89.25-95.30%)                                                                                                  | 89.30% (87.03%-91.20%)                              | 96.6-98.1%                                               | 73.0-97.0%                                               |

(b)

| <b>Primary/triage test combinations</b> | <b>Sensitivity CIN2+ targets</b> | <b>Specificity CIN2+ targets as</b> | <b>Model calculated sensitivity to CIN2+<sup>@</sup></b> | <b>Model calculated specificity to CIN2+<sup>@</sup></b> |
|-----------------------------------------|----------------------------------|-------------------------------------|----------------------------------------------------------|----------------------------------------------------------|
|-----------------------------------------|----------------------------------|-------------------------------------|----------------------------------------------------------|----------------------------------------------------------|



|                                               |                                                     |                                                     |                                                                                   |                                                        |
|-----------------------------------------------|-----------------------------------------------------|-----------------------------------------------------|-----------------------------------------------------------------------------------|--------------------------------------------------------|
| <b>HPV positive, HPV 16/18 triage*</b>        | 52.9% (95% CI 50.2-55.7%)                           | 74.5% (95% CI 70.3-79.0%)                           | 46.3-75.9%                                                                        | 67.2-86.3%                                             |
| <b>HPV positive, Cytology triage (ASCUS)*</b> | 71.5% (95%CI: 65.2-77.1%)                           | 74.7% (95% CI 69.2-79.5%)                           | 70.1-74.7%                                                                        | 68.1-85.2%                                             |
| <b>HPV positive, VIA triage *</b>             | Range: 45.2% to 84.2%                               | Range: 44.8% to 94.5%                               | 39.2-42.99%                                                                       | 73.3-76.9%                                             |
| <b>Primary cytology (LSIL cut-off)</b>        | LBC: 70.3% (59.7-79.1%)<br>Conv: 62.8% (46.8-76.5%) | LBC: 96.2% (94.6-97.4%)<br>Conv: 97.7% (96.1-98.7%) | 67-71.3%<br><br>Sensitivity analysis**: 46.8% (lower bound) – 80% (upper bound)   | 94.1-97.8%                                             |
| <b>Primary HPV</b>                            | 92.60% (89.25-95.30%)                               | 89.30% (87.03%-91.20%)                              | 96.6-98.1%<br><br>Sensitivity analysis**: 88% (lower bound) – 95.7% (upper bound) | 73.0-97.0%                                             |
| <b>Cytology ASCUS, HPV triage</b>             | 96.2% (95% CI : 91.7-98.3%)                         | 54.9% (95% CI:43.5-65.9%)                           | 96.9-98.2%                                                                        | 39.2-88.1%                                             |
| <b>Primary VIA</b>                            | 41%<br>Range: 30-60%                                | 78%                                                 | Lower bound: 39.1-42.8%<br><br>Upper bound: 60-64%                                | Lower bound: 78.0-80.8%<br><br>Upper bound: 78.6-79.4% |

\*Data available for women aged 35-60. ^Liquid-based cytology assumed, and HPV test using ATIMA.\*\*Sensitivity analysis on the sensitivity of primary HPV, primary cytology and primary VIA are performed on predictions of incidence and mortality reductions. @Range of sensitivity and specificity here. We assume a fixed test performance for each test across all scenarios. As disease burden varies substantially across all-78 LMIC, equivalent test performance may result in different sensitivity and specificity at a population-level; for instance, tests used in settings with high rates of CIN2/3 will generate different sensitivity calculation compared with settings with very low rates of disease.

(c)

| <b>Primary test</b>                    | <b>Sensitivity CIN2+ data</b>                                                                                                 |
|----------------------------------------|-------------------------------------------------------------------------------------------------------------------------------|
| <b>Primary VIA</b>                     | Based on combined evidence from systematic reviews and population longitudinal data we consider range of 30-60 <sup>^</sup> % |
| <b>Primary cytology (LSIL cut-off)</b> | Based on performance across conventional and LBC, we consider range of 46.8%-80%                                              |
| <b>Primary HPV</b>                     | Based on performance reported from studies, we consider range of 88%-96%                                                      |

<sup>^</sup>60% sensitivity values are presented explicitly for all scenarios.

Supplementary Table 4: Probability of receiving a specific test result by underlying health state for (a) VIA, (b) VIA (high sensitivity), (c) VAT, (d) cytology, (e) HPV. The same test probability matrix is used when the test is used as a primary or triage test.

(a) VIA

| Health state                    | Negative | Positive (eligible for ablation) | Positive (ineligible for ablation) | Suspicious for cancer |
|---------------------------------|----------|----------------------------------|------------------------------------|-----------------------|
| Well                            | 81.0%    | 18.05%                           | 0.95%                              | 0%                    |
| HPV (no CIN)                    | 75.0%    | 23.75%                           | 1.25%                              | 0%                    |
| Productive HPV infection (CIN1) | 70.0%    | 27.0%                            | 3.0%                               | 0%                    |
| CIN2                            | 65.0%    | 24.5%                            | 10.5%                              | 0%                    |
| CIN3                            | 59.0%    | 20.5%                            | 16.4%                              | 0%                    |
| Cervical cancer                 | 40.0%    | 0%                               | 0%                                 | 60.0%                 |

(b) VIA (high sensitivity)

| Health state                    | Negative | Positive (eligible for ablation) | Positive (ineligible for ablation) | Suspicious for cancer |
|---------------------------------|----------|----------------------------------|------------------------------------|-----------------------|
| Well                            | 80.0%    | 19.0%                            | 1.0%                               | 0%                    |
| HPV (no CIN)                    | 74.0%    | 24.7%                            | 1.3%                               | 0%                    |
| Productive HPV infection (CIN1) | 69.0%    | 27.9%                            | 3.1%                               | 0%                    |
| CIN2                            | 50.0%    | 35.0%                            | 15.0%                              | 0%                    |
| CIN3                            | 37.0%    | 31.5%                            | 25.2%                              | 6.3%                  |
| Cervical cancer                 | 12.0%    | 0%                               | 0%                                 | 88.0%                 |

(c) VIA used as a visual assessment for treatment

| Health state                    | Eligible for ablation | Ineligible for ablation |
|---------------------------------|-----------------------|-------------------------|
| Well                            | 99.05%                | 0.95%                   |
| HPV (no CIN)                    | 98.75%                | 1.25%                   |
| Productive HPV infection (CIN1) | 97.0%                 | 3.0%                    |
| CIN2                            | 89.50%                | 10.5%                   |
| CIN3                            | 79.5%                 | 16.4%                   |
| Cervical cancer                 | 40.0%                 | 60.0%                   |

(d) Cytology

| Health state                    | Negative | ASC-US | LSIL   | ASC-H+ |
|---------------------------------|----------|--------|--------|--------|
| Well                            | 96.72%   | 1.35%  | 1.33%  | 0.6%   |
| HPV (no CIN)                    | 89.3%    | 4.8%   | 4.8%   | 1.1%   |
| Productive HPV infection (CIN1) | 45.95%   | 24.69% | 20.58% | 8.78%  |
| CIN2                            | 41.59%   | 1.71%  | 24.3%  | 32.4%  |
| CIN3                            | 24.49%   | 3.51%  | 25.2%  | 46.8%  |

(e) HPV

| Health state                    | Negative | Positive |
|---------------------------------|----------|----------|
| Well                            | 98.6%    | 1.4%     |
| HPV (no CIN)                    | 44.0%    | 56.0%    |
| Productive HPV infection (CIN1) | 15.85%   | 84.15%   |
| CIN2                            | 7.0%     | 93.0%    |
| CIN3+                           | 1.6%     | 98.40%   |

*Supplementary Table 5: List of included LMIC in the analysis*

| Country      | WHO Region                | Female population, 2020 (30-49 years) ('000)* | GDP per-capita (World Bank 2019 unless noted otherwise) |
|--------------|---------------------------|-----------------------------------------------|---------------------------------------------------------|
| Afghanistan  | South Asia                | 3586                                          | 507                                                     |
| Angola       | Sub-Saharan Africa        | 3138                                          | 2791                                                    |
| Bangladesh   | South Asia                | 23841                                         | 1856                                                    |
| Benin        | Sub-Saharan Africa        | 1222                                          | 1219                                                    |
| Bhutan       | South Asia                | 103                                           | 3316                                                    |
| Bolivia      | Latin America & Caribbean | 1437                                          | 3552                                                    |
| Burkina Faso | Sub-Saharan Africa        | 2029                                          | 787                                                     |
| Burundi      | Sub-Saharan Africa        | 1572                                          | 261                                                     |
| Cape Verde   | Sub-Saharan Africa        | 77                                            | 3604                                                    |
| Cambodia     | East Asia & Pacific       | 2246                                          | 1643                                                    |

| <b>Country</b>           | <b>WHO Region</b>          | <b>Female population, 2020 (30-49 years) ('000)*</b> | <b>GDP per-capita (World Bank 2019 unless noted otherwise)</b> |
|--------------------------|----------------------------|------------------------------------------------------|----------------------------------------------------------------|
| Cameroon                 | Sub-Saharan Africa         | 2770                                                 | 1507                                                           |
| Central African Republic | Sub-Saharan Africa         | 423                                                  | 468                                                            |
| Chad                     | Sub-Saharan Africa         | 1424                                                 | 710                                                            |
| Comoros                  | Sub-Saharan Africa         | 96                                                   | 1370                                                           |
| Congo Dem. Rep.          | Sub-Saharan Africa         | 8248                                                 | 581                                                            |
| Congo                    | Sub-Saharan Africa         | 608                                                  | 2280                                                           |
| Cote d'Ivoire            | Sub-Saharan Africa         | 2625                                                 | 2276                                                           |
| Djibouti                 | Middle East & North Africa | 135                                                  | 3415                                                           |
| Egypt                    | Middle East & North Africa | 12972                                                | 3019                                                           |
| El Salvador              | Latin America & Caribbean  | 903                                                  | 4187                                                           |
| Eritrea                  | Sub-Saharan Africa         | 374                                                  | 567*                                                           |
| Ethiopia                 | Sub-Saharan Africa         | 11462                                                | 856                                                            |
| The Gambia               | Sub-Saharan Africa         | 237                                                  | 778                                                            |
| Georgia                  | Europe & Central Asia      | 553                                                  | 4698                                                           |
| Ghana                    | Sub-Saharan Africa         | 3555                                                 | 2202                                                           |
| Guinea                   | Sub-Saharan Africa         | 1298                                                 | 963                                                            |
| Guinea-Bissau            | Sub-Saharan Africa         | 215                                                  | 697                                                            |
| Haiti                    | Latin America & Caribbean  | 1460                                                 | 1272                                                           |
| Honduras                 | Latin America & Caribbean  | 1270                                                 | 2575                                                           |

| <b>Country</b>  | <b>WHO Region</b>          | <b>Female population, 2020 (30-49 years) ('000)*</b> | <b>GDP per-capita (World Bank 2019 unless noted otherwise)</b> |
|-----------------|----------------------------|------------------------------------------------------|----------------------------------------------------------------|
| India           | South Asia                 | 185040                                               | 2100                                                           |
| Indonesia       | East Asia & Pacific        | 39405                                                | 4136                                                           |
| Kenya           | Sub-Saharan Africa         | 6259                                                 | 1817                                                           |
| Korea Dem. Rep. | East Asia & Pacific        | 3644                                                 | 640*                                                           |
| Kyrgyz Republic | Europe & Central Asia      | 858                                                  | 1309                                                           |
| Lao PDR         | East Asia & Pacific        | 927                                                  | 2535                                                           |
| Lesotho         | Sub-Saharan Africa         | 258                                                  | 1118                                                           |
| Liberia         | Sub-Saharan Africa         | 535                                                  | 622                                                            |
| Madagascar      | Sub-Saharan Africa         | 2889                                                 | 523                                                            |
| Malawi          | Sub-Saharan Africa         | 1912                                                 | 412                                                            |
| Mali            | Sub-Saharan Africa         | 1839                                                 | 879                                                            |
| Mauritania      | Sub-Saharan Africa         | 517                                                  | 1679                                                           |
| Moldova         | Europe & Central Asia      | 668                                                  | 4504                                                           |
| Mongolia        | East Asia & Pacific        | 497                                                  | 4340                                                           |
| Morocco         | Middle East & North Africa | 5232                                                 | 3204                                                           |
| Mozambique      | Sub-Saharan Africa         | 3094                                                 | 504                                                            |
| Myanmar         | East Asia & Pacific        | 7926                                                 | 1408                                                           |
| Nepal           | South Asia                 | 4230                                                 | 1071                                                           |
| Nicaragua       | Latin America & Caribbean  | 942                                                  | 1913                                                           |
| Niger           | Sub-Saharan Africa         | 1978                                                 | 554                                                            |
| Nigeria         | Sub-Saharan Africa         | 20453                                                | 2230                                                           |

| <b>Country</b>        | <b>WHO Region</b>          | <b>Female population, 2020 (30-49 years) ('000)*</b> | <b>GDP per-capita (World Bank 2019 unless noted otherwise)</b> |
|-----------------------|----------------------------|------------------------------------------------------|----------------------------------------------------------------|
| Pakistan              | South Asia                 | 25495                                                | 1285                                                           |
| Papua New Guinea      | East Asia & Pacific        | 1058                                                 | 2829                                                           |
| Philippines           | East Asia & Pacific        | 13821                                                | 3485                                                           |
| Rwanda                | Sub-Saharan Africa         | 1498                                                 | 820                                                            |
| Sao Tome and Principe | Sub-Saharan Africa         | 23                                                   | 1947                                                           |
| Senegal               | Sub-Saharan Africa         | 1819                                                 | 1447                                                           |
| Sierra Leone          | Sub-Saharan Africa         | 832                                                  | 528                                                            |
| Solomon Islands       | East Asia & Pacific        | 77                                                   | 2374                                                           |
| Somalia               | Sub-Saharan Africa         | 1321                                                 | 105*                                                           |
| South Sudan           | Sub-Saharan Africa         | 1119                                                 | 1120 (2015)                                                    |
| Sri Lanka             | South Asia                 | 3006                                                 | 3853                                                           |
| Sudan                 | Sub-Saharan Africa         | 4560                                                 | 442                                                            |
| Swaziland             | Sub-Saharan Africa         | 174                                                  | 3895                                                           |
| Syrian Arab Republic  | Middle East & North Africa | 2440                                                 | 1194*                                                          |
| Tajikistan            | Europe & Central Asia      | 1144                                                 | 871                                                            |
| Tanzania              | Sub-Saharan Africa         | 6009                                                 | 1122                                                           |
| Timor-Leste           | East Asia & Pacific        | 129                                                  | 1561                                                           |
| Togo                  | Sub-Saharan Africa         | 911                                                  | 679                                                            |
| Tunisia               | Middle East & North Africa | 1792                                                 | 3317                                                           |
| Uganda                | Sub-Saharan Africa         | 4283                                                 | 794                                                            |
| Ukraine               | Europe & Central Asia      | 6861                                                 | 3659                                                           |

| <b>Country</b> | <b>WHO Region</b>          | <b>Female population, 2020 (30-49 years) ('000)*</b> | <b>GDP per-capita (World Bank 2019 unless noted otherwise)</b> |
|----------------|----------------------------|------------------------------------------------------|----------------------------------------------------------------|
| Uzbekistan     | Europe & Central Asia      | 4791                                                 | 1725                                                           |
| Vanuatu        | East Asia & Pacific        | 36                                                   | 3115                                                           |
| Viet Nam       | East Asia & Pacific        | 14787                                                | 2715                                                           |
| Palestine      | Middle East & North Africa | 548                                                  | 3562 (2018)                                                    |
| Yemen          | Middle East & North Africa | 3217                                                 | 774                                                            |
| Zambia         | Sub-Saharan Africa         | 1838                                                 | 1305                                                           |
| Zimbabwe       | Sub-Saharan Africa         | 1727                                                 | 1464                                                           |

\* Sourced from UN Data. 2019. (Accessed February 10, 2021 at <https://data.un.org/>)



Supplementary Table 6: Aggregate costs across 78 LMICs for each screening-related event.<sup>+</sup>

| Event                                               | Cost (US\$ 2019) |                                                                                                                |
|-----------------------------------------------------|------------------|----------------------------------------------------------------------------------------------------------------|
|                                                     | Base-case        | Range in sensitivity analysis                                                                                  |
| Primary VIA <sup>^</sup>                            | 7.12             | +/-20% (5.70-8.54)                                                                                             |
| Primary HPV DNA (+/-16/18)*                         | 15.09            | +/-30% (10.56-19.62)                                                                                           |
| Primary cytology <sup>^</sup>                       | 18.02            | +/-20% (14.42-21.62)                                                                                           |
| VIA triage <sup>o</sup>                             | 2.95             | +/-20% (2.36-3.54)                                                                                             |
| Cytology triage <sup>o</sup>                        | 15.62            | +/-20% (12.5-18.74)                                                                                            |
| HPV triage <sup>o</sup>                             | 8.15             | Upper end informed by current high-end values; lower end represents potential cost at higher volumes (5-10.06) |
| Colposcopy <sup>o,#</sup>                           | 9.96             | -                                                                                                              |
| Ablative treatment                                  | 11.76            | +/-30% (8.23-15.29)                                                                                            |
| Excisional treatment                                | 41.67            | +/-30% (29.17-54.17)                                                                                           |
| Histology <sup>@</sup>                              | 17.96            | -                                                                                                              |
| Punch biopsy/Biopsy                                 | 11.61            | -                                                                                                              |
| Endocervical curettage (ECC)                        | 6.4              | -                                                                                                              |
| Cancer diagnosis and treatment– FIGO 1 <sup>a</sup> | 261.43           | one-way: +40%, no lower bound (366.00)<br>For PSA: +/-20% (209.14-313.72)                                      |
| Cancer diagnosis and treatment– FIGO 2 <sup>a</sup> | 540.23           | one-way: +40%, no lower bound (756.32)<br>For PSA: +/-20% (432.18-648.28)                                      |
| Cancer diagnosis and treatment– FIGO 3 <sup>a</sup> | 673.93           | one-way: +40%, no lower bound (943.50)<br>For PSA: +/-20% (539.14-808.72)                                      |
| Cancer diagnosis and treatment– FIGO 4 <sup>a</sup> | 307.95           | one-way: +40%, no lower bound (431.13)<br>For PSA: +/-20% (246.36-369.54)                                      |
| Palliative care <sup>a</sup>                        | 115.13           | -                                                                                                              |
| Yearly surveillance after treatment <sup>a</sup>    | 57.66            | -                                                                                                              |

<sup>+</sup>Aggregate costs represent the average across 78 LMIC, i.e. the sum of the country-level costs weighted by the proportion of the 78 LMIC population of 30-49 year-old females in each country.

<sup>^</sup> Includes consumables, administering provider/workforce, and programmatic utilisation costs.

<sup>\*</sup> Includes cost of test, sample drop-off and transport, laboratory staff time, lab supplies, general administration and overhead costs of primary screening using WHO-CHOICE methodology and database.

<sup>o</sup> Same as primary, but excludes a proportion of the labour, programmatic and utilisation costs from primary visits due to not requiring another visit. When VIA is used during colposcopy, we assume no cost.

<sup>#</sup> Includes consumables/equipment, workforce.

<sup>@</sup> Includes consumables/equipment, workforce including pathologist and biomedical scientist.

<sup>a</sup> Cancer costs are only applied to the proportion of cancers that are treated and assumed to apply to 90% of screen-detected cases in the base case. Surveillance costs are applied from 1 year after diagnosis until death, or a maximum of 5 years if the woman survives for this amount of time.

Supplementary Table 7: Aggregate costs across each region for each screening-related event.<sup>+</sup>

| Event                                               | Cost (US\$ 2019)    |                       |                           |                            |            |                    |
|-----------------------------------------------------|---------------------|-----------------------|---------------------------|----------------------------|------------|--------------------|
|                                                     | East Asia & Pacific | Europe & Central Asia | Latin America & Caribbean | Middle East & North Africa | South Asia | Sub-Saharan Africa |
| Primary VIA <sup>^</sup>                            | 7.39                | 15.59                 | 7.83                      | 8.82                       | 5.71       | 7.77               |
| Primary HPV DNA (+/- 16/18)*                        | 14.07               | 21.42                 | 16.47                     | 17.16                      | 14.01      | 16.46              |
| Primary cytology <sup>^</sup>                       | 16.9                | 37.08                 | 19.86                     | 21.97                      | 15.55      | 19.46              |
| VIA triage <sup>o</sup>                             | 2.01                | 8.89                  | 4.55                      | 3.25                       | 2.23       | 4.23               |
| Cytology triage <sup>o</sup>                        | 14.25               | 31.24                 | 17.44                     | 19.04                      | 13.57      | 17.19              |
| HPV triage <sup>o</sup>                             | 8.15                | 8.15                  | 8.15                      | 8.15                       | 8.15       | 8.15               |
| Colposcopy <sup>o,#</sup>                           | 9.92                | 20.12                 | 10.8                      | 11.73                      | 8.57       | 10.47              |
| Ablative treatment                                  | 11.71               | 22.32                 | 12.53                     | 13.31                      | 10.5       | 11.97              |
| Excisional treatment                                | 41.58               | 53.41                 | 43.55                     | 43.72                      | 40.03      | 42.36              |
| Histology <sup>@</sup>                              |                     |                       |                           |                            |            |                    |
| Punch biopsy/Biopsy                                 | 15.8                | 32.09                 | 20.4                      | 21.52                      | 16.14      | 19.9               |
| ECC                                                 | 11.22               | 23                    | 12.9                      | 14.04                      | 9.9        | 12.68              |
| Cancer diagnosis and treatment– FIGO 1 <sup>a</sup> | 4.94                | 11.66                 | 7.47                      | 8.31                       | 5.68       | 7.58               |
| Cancer diagnosis and treatment– FIGO 2 <sup>a</sup> | 241.24              | 329.07                | 327.26                    | 307.84                     | 262.29     | 277.57             |
| Cancer diagnosis and treatment– FIGO 3 <sup>a</sup> | 463.28              | 648.75                | 670.03                    | 571.68                     | 555.75     | 611.42             |
| Cancer diagnosis and treatment– FIGO 4 <sup>a</sup> | 555.59              | 813.31                | 850.77                    | 695.41                     | 699.96     | 785.4              |
| Palliative care <sup>a</sup>                        | 244.31              | 367.05                | 389.39                    | 303.95                     | 323.07     | 369.26             |
| Yearly surveillance after treatment <sup>a</sup>    | 48.89               | 69.88                 | 72.42                     | 61.11                      | 59.47      | 65.75              |

<sup>+</sup>Aggregate costs represent the average across 78 LMIC, i.e. the sum of the country-level costs weighted by the proportion of the 78 LMIC population of 30-49 year-old females in each country.

<sup>^</sup> Includes consumables, administering provider/workforce, and programmatic utilisation costs.

\* Includes cost of test, sample drop-off and transport, laboratory staff time, lab supplies, general administration and overhead costs of primary screening using WHO-CHOICE methodology and database.

<sup>o</sup> Same as primary, but excludes a proportion of the labour, programmatic and utilisation costs from primary visits due to not requiring another visit. When VIA is used during colposcopy, we assume no cost.

<sup>#</sup> Includes consumables/equipment, workforce.

<sup>@</sup> Includes consumables/equipment, workforce including pathologist and biomedical scientist.

<sup>a</sup> Cancer costs are only applied to the proportion of cancers that are treated and assumed to apply to 90% of screen-detected cases in the base case. Surveillance costs are applied from 1 year after diagnosis until death, or a maximum of 5 years if the woman survives for this amount of time.

Supplementary Table 8: Aggregate disutilities across 78 LMICs<sup>+</sup>

| Event                                               | Annualized disutility weight |                                                | Duration disutility is applied                                                          |
|-----------------------------------------------------|------------------------------|------------------------------------------------|-----------------------------------------------------------------------------------------|
|                                                     | Baseline                     | Range in sensitivity analysis                  |                                                                                         |
| Cancer diagnosis and treatment– FIGO 1 <sup>a</sup> | 0.288                        | For PSA: 0-100% (0-0.288)*                     | Year of diagnosis                                                                       |
| Cancer diagnosis and treatment– FIGO 2 <sup>a</sup> | 0.288                        | For PSA: 0-100% (0-0.288)*                     | Year of diagnosis                                                                       |
| Cancer diagnosis and treatment– FIGO 3 <sup>a</sup> | 0.288                        | For PSA: 0-100% (0-0.288)*                     | Year of diagnosis                                                                       |
| Cancer diagnosis and treatment– FIGO 4 <sup>a</sup> | 0.451                        | For PSA: 0-100% (0-0.451)*                     | Year of diagnosis until last 3 months of life                                           |
| Palliative care <sup>a</sup>                        | 0.54                         | For PSA: 0-100% (0-0.54)*                      | Last 3 months of life                                                                   |
| Yearly surveillance after treatment <sup>a,b</sup>  | 0.049                        | For PSA: 0-100% (0-0.049)*                     | Every year of cancer after the first year up to the last 3 months of life (or survival) |
| Pre-cancer treatment                                | 0                            | 0.01 assumed for one-way sensitivity analysis. | (Sensitivity analysis): year of pre-cancer treatment                                    |

+Aggregate costs represent the average across 78 LMIC, i.e. the sum of the country-level costs weighted by the proportion of the 78 LMIC population of 30-49 year-old females in each country.

\* All disutilities are varied together within PSA, i.e. all events would have a value of X% multiplied by their baseline. This is to avoid unrealistic scenarios that could occur if they varied independently such as the FIGO1 diagnosis and treatment having a higher disutility than FIGO4 diagnosis and treatment.

<sup>a</sup> Cancer disutilities are only applied to the proportion of cancers that are treated and assumed to apply to 90% of screen-detected cases. Surveillance disutilities are applied from 1 year after diagnosis until death, or a maximum of 5 years if the woman survives for this amount of time.

<sup>b</sup> Excludes FIGO4
